# Supplementary material for: Diethyl phthalate (DEP) perturbs nitrogen metabolism in Saccharomyces cerevisiae
Source: PubMed Central journal article supplement (PMC9205984; doi:10.1038/s41598-022-14284-w), 2022-06-17
Supplement: 41598_2022_14284_MOESM1_ESM.pdf [file 41598_2022_14284_MOESM1_ESM.pdf]

## Supplemental data

### Legends for Supplemental Figures

#### **Figure S1. DNA damage mutants are not sensitive to DEP**

Comparison of normalized growth (OD<sub>600</sub>) of individual HOP mutants (BY4743) treated with 1.56 mM DEP and 3.125 mM ENA. Error bars indicate standard deviation ( $N = 2$ ).

#### **Figure S2. The *stp1Δ* and *dall1Δ* mutants are sensitive to DEP but not to MEHP**

Heat maps generated using GraphPad Prism 9.0, indicate normalized growth of wild-type (BY4743) and selected HOP mutants treated with MEHP and DEP ( $N = 2$ ).

#### **Figure S3. Toxicity caused by DEP but not MEHP is rescued by addition of amino acids to the medium**

Normalized growth (OD<sub>600</sub>) curves of overnight wild-type ( $\Sigma$  1278b) cultures treated with a series of concentrations of DEP and MEHP in minimal Urea medium with 0, 2.5mM, 5mM or 10mM phenylalanine. Two-fold serial dilution of the compounds were used (maximum concentrations at 12.5 mM for MEHP, 25 mM for DEP).

#### **Figure S4. Constitutive activation of SPS signalling pathway does not rescue DEP toxicity**

Comparison of normalized growth (OD<sub>600</sub>) between *gap1Δ* and *gap1Δ ssy1Δ* ( $\Sigma$ 1278b background), which express the constitutively active *STP1* (pCA022 or pCA023) or an empty vector (*pRS316*) against a series of DEP concentrations in the absence (-F) and presence (+F) of phenylalanine. Two-fold serial dilution of DEP (maximum concentration at 25 mM) was used. Error bars indicate standard deviation ( $N = 2$ ).

**Figure S5. PA and IPA are not toxic to yeast cells unlike their ester derivatives DEP and DMIP**

- (A) Comparison of normalized growth ( $OD_{600}$ ) of wild-type ( $\Sigma 1278b$ ) and *gap1 $\Delta$  ssy1 $\Delta$*  treated with DEP or DMIP after 24 h. Two-fold serial dilution of the compounds were used (maximum concentrations at 25 mM for DEP, 6.25 mM for DMIP).
- (B) Comparison of normalized growth ( $OD_{600}$ ) of wild-type ( $\Sigma 1278b$ ) and *gap1 $\Delta$  ssy1 $\Delta$*  treated with PA or IPA after 24 h. Two-fold serial dilution of the compounds were used (maximum concentrations at 25 mM for PA and 6.25 mM for IPA). Error bars indicate standard deviation ( $N = 2$ ).

Chemical structures illustrating the respective compounds are indicated on the left of each graph.

**Figure S6. DEP is not converted to PA in yeast cells**

LC-MS profiles of yeast cells treated with 3.13 mM DEP (left) and standards (right). Top: TIC of yeast cell extract; (a) EIC of  $m/z$  223.09703 (DEP); (b) EIC of  $m/z$  195.06573 (MEP); (c) EIC of  $m/z$  167.03443 (PA, not detected in yeast cell extract).

**Figure S7. Amino acid addition rescues both DEP and Pentyl paraben toxicity**

Comparison of growth percentages in wild type ( $\Sigma 1278b$ ) cells treated with DEP (1.56 mM) or Pentyl paraben (0.195 mM) in the absence (No AA) and presence of amino acids phenylalanine (F) and Leucine (L). Error bars indicate standard deviation ( $N = 2$ ) (One-tailed paired  $t$ -test: \* implies  $P < 0.05$ ).

**Figure S8. Aromatic esters but not aliphatic esters are toxic to yeast cells**

Comparison of growth (OD<sub>600</sub>) with aromatic versus aliphatic esters. Wild type, *stp1Δ*, *dal81Δ* and *mms1Δ* cells were treated with a series of concentrations for the compounds DEP, methyl benzoate, DMP, ethyl hexanoate, ethyl acetate, ethyl propionate, methyl hexanoate and ethyl butyrate. Two-fold serial dilution of the compounds were used (maximum concentrations at 25 mM for DEP, ethyl acetate, ethyl propionate and ethyl butyrate, 12.5 mM for methyl benzoate, DMIP, ethyl hexanoate and methyl hexanoate). Error bars indicate standard deviation ( $N = 2$ ).

### **Figure S9. DEP alters the amino acid profile of yeast cells**

Relative molar percentages of various amino acids in DMSO- and DEP-treated cultures after 4 h and 8 h of incubation in minimal Urea medium as detected by mass-spectrometry. Error bars indicate standard deviation ( $N = 3$ ).

### **Figure S10 Treatment of yeast cells with DEP reduces TORC1 activity**

- A) Unprocessed image of two western blots related to Figure 9C is presented here.
- B) Annotation of samples in the processed image derived from the two western blots in A.  
Please note that the western blot at the top includes protein samples from DMSO-treated yeast cells (duplicated in the bottom western blot) and positive-control cells treated with 40 nM rapamycin (this was not essential as DEP inhibited TORC1), which were not included in the images presented in Figure 9C.

### **Figure S11. Working model for DEP's mechanism of growth inhibition of yeast cells**

- A) TORC1 activity is low in poor nitrogen medium. DEP further inhibits TORC1 activity and disrupts nitrogen metabolism and growth.
- B) In the presence of amino acids, SPS pathway is activated, which results in amino acid uptake. Catabolism of amino acids produces glutamate (Glu) via the Ehrlich pathway.

Glutamate gets converted to glutamine (Gln) which then activates TORC1 in overcoming the inhibition caused by DEP.

**Table S1. Yeast strains used in the study**

| <b>Strain number</b> | <b>Genotype</b>                                                                                           | <b>Reference</b>           |
|----------------------|-----------------------------------------------------------------------------------------------------------|----------------------------|
| 4847                 | MAT $\alpha$ <i>ura3 lys2 ho::LYS2</i>                                                                    | Iraqi <i>et al.</i> (1999) |
| 4848                 | MAT $\alpha$ <i>gap1<math>\Delta</math>::kanMX2 ura3 lys2 ho::LYS2</i>                                    | Iraqi <i>et al.</i> (1999) |
| 4849                 | MAT $\alpha$ <i>gap1::KanMX2 stp1::KanMX2 stp2::kanMX2 dal81::KanMX2 ura3 lys2 ho::LYS2</i>               | Abdel-Sater (2004)         |
| 4863                 | MAT $\alpha$ <i>gap1<math>\Delta</math>::kanMX2 ssy1<math>\Delta</math>::NatMX6 ura3 lys2 ho::LYS2</i>    | This study                 |
| 4864                 | MAT $\alpha$ <i>ssy1<math>\Delta</math>::NatMX4 ura3 lys2 ho::LYS2</i>                                    | This study                 |
| CG1                  | MAT $\alpha$ <i>ura3 lys2 ho::LYS2 pAGP1-lacZ::URA3</i>                                                   | This study                 |
| CG2                  | MAT $\alpha$ <i>gap1<math>\Delta</math>::KanMX2 ssy1<math>\Delta</math>::kanMX2 ura3 pAGP1-lacZ::URA3</i> | This study                 |

|          |                                                                                                                                            |            |
|----------|--------------------------------------------------------------------------------------------------------------------------------------------|------------|
| CG3/4894 | MAT $\alpha$ <i>gap1</i> $\Delta$ :: <i>kanMX2 ura3 pAGP1-lacZ::URA3</i>                                                                   | This study |
| CG4      | MAT $\alpha$ <i>gap1</i> $\Delta$ :: <i>KanMX2 stp1</i> $\Delta$ :: <i>KanMX2 stp2</i> $\Delta$ :: <i>KanMX2 ura3 pAGP1-lacZ::URA3</i>     | This study |
| CG9      | MAT $\alpha$ <i>gap1</i> $\Delta$ :: <i>kanMX2 ssy1</i> $\Delta$ :: <i>NatMX6ura3 lys2 ho::LYS2 pCA022 -STP1</i> $\Delta$ <i>131::URA3</i> | This study |
| CG10     | MAT $\alpha$ <i>gap1</i> $\Delta$ :: <i>kanMX2 ssy1</i> $\Delta$ :: <i>NatMX2 ura3 lys2 ho::LYS2 pCA022-STP1</i> $\Delta$ <i>132::URA3</i> | This study |
| CG12     | MAT $\alpha$ <i>gap1</i> $\Delta$ :: <i>kanMX2 ssy1</i> $\Delta$ :: <i>NatMX2 ura3 lys2 ho::LYS2</i>                                       | This study |
| CG13     | MAT $\alpha$ <i>gap1</i> $\Delta$ :: <i>kanMX2 ura3 lys2 ho::LYS2 pCA022 -STP1</i> $\Delta$ <i>131</i>                                     | This study |
| CG14     | MAT $\alpha$ <i>gap1</i> $\Delta$ :: <i>kanMX2 ura3 lys2 ho::LYS2 pCA022 -STP1</i> $\Delta$ <i>132</i>                                     | This study |
| CG16     | MAT $\alpha$ <i>gap1</i> $\Delta$ :: <i>kanMX2 ura3 pRS316</i>                                                                             | This study |
| CG17     | MAT $\alpha$ <i>gap1</i> $\Delta$ <i>ssy1</i> $\Delta$ <i>stp1</i> $\Delta$ <i>N</i>                                                       | This study |

## **Table S2. Homozygous profiling data for DEP.**

Excel worksheet 'DEP' contains the raw HOP data indicating the logFC values for 4817 deletion strains along with the corresponding P-value, logCPM (Counts per Million), Likelihood Ratio (LR) and False Discovery Rate (FDR).

Excel worksheet 'logFC<-0.5 PVALUE<0.05,' contains the list of 78 genes that confer resistance to DEP.

Excel Worksheet 'GO' (Gene Ontology) contains enrichment analysis results for 78 genes obtained using DAVID for the GO categories namely, Biological Process (BP), Cellular Component (CC) and Molecular Function (MF).

Excel Worksheet 'REVIGO' contain the REVIGO Tree analysis of the overrepresented GO terms obtained with DAVID (GO terms with a P-value<0.05).

#

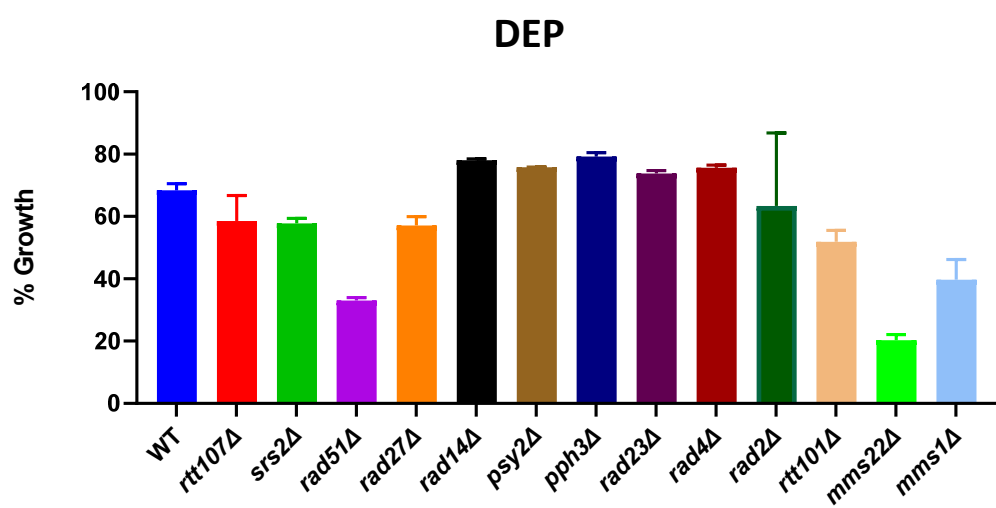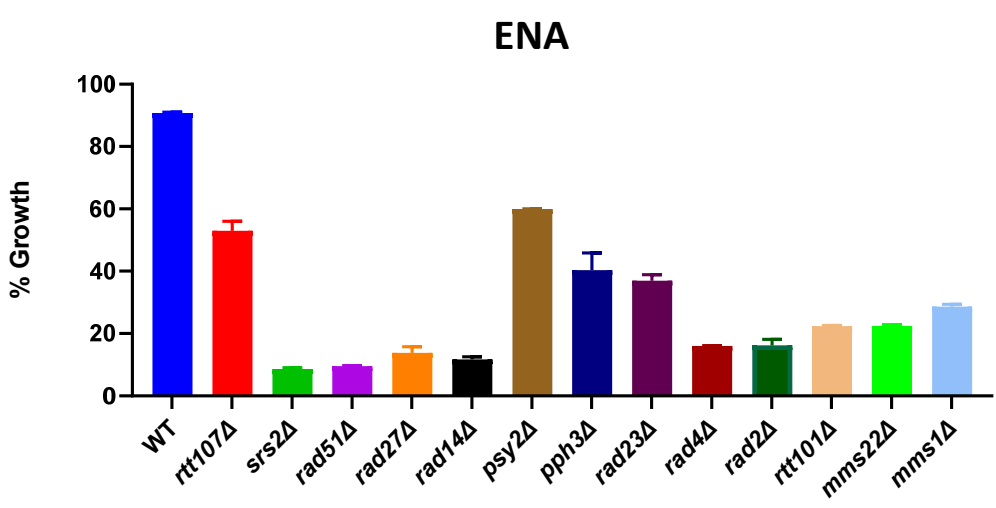

Figure S1

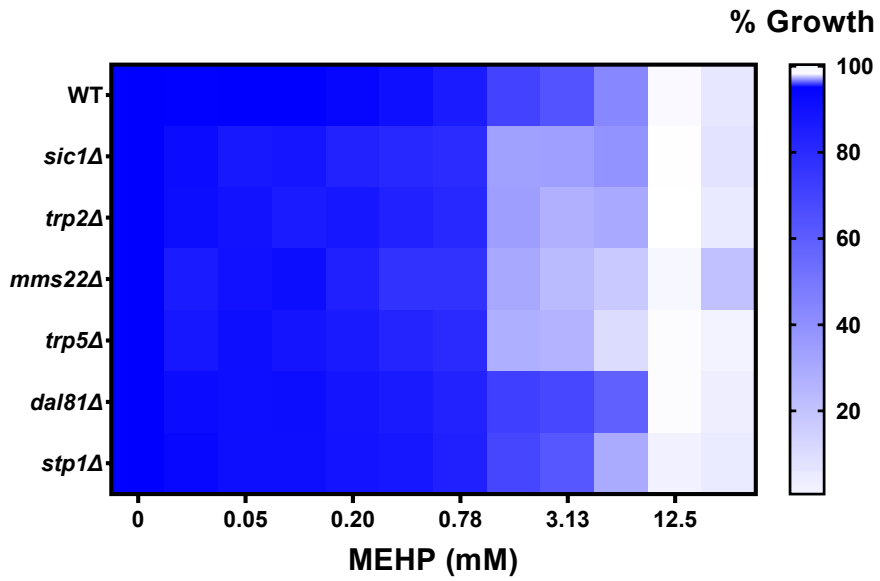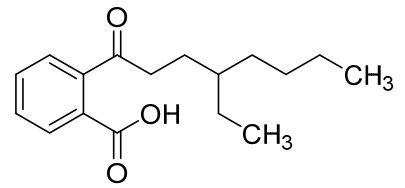

**MEHP**

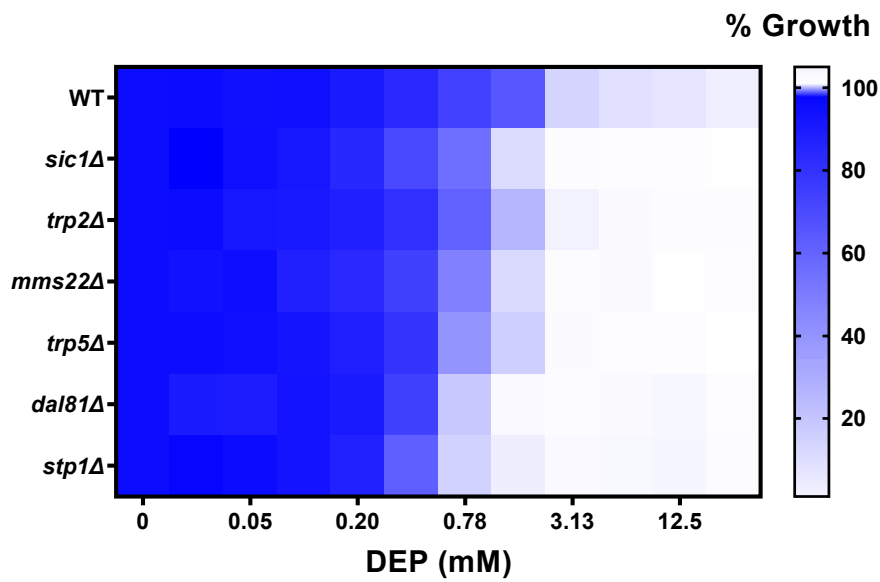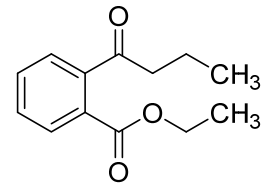

**DEP**

**Figure S2**



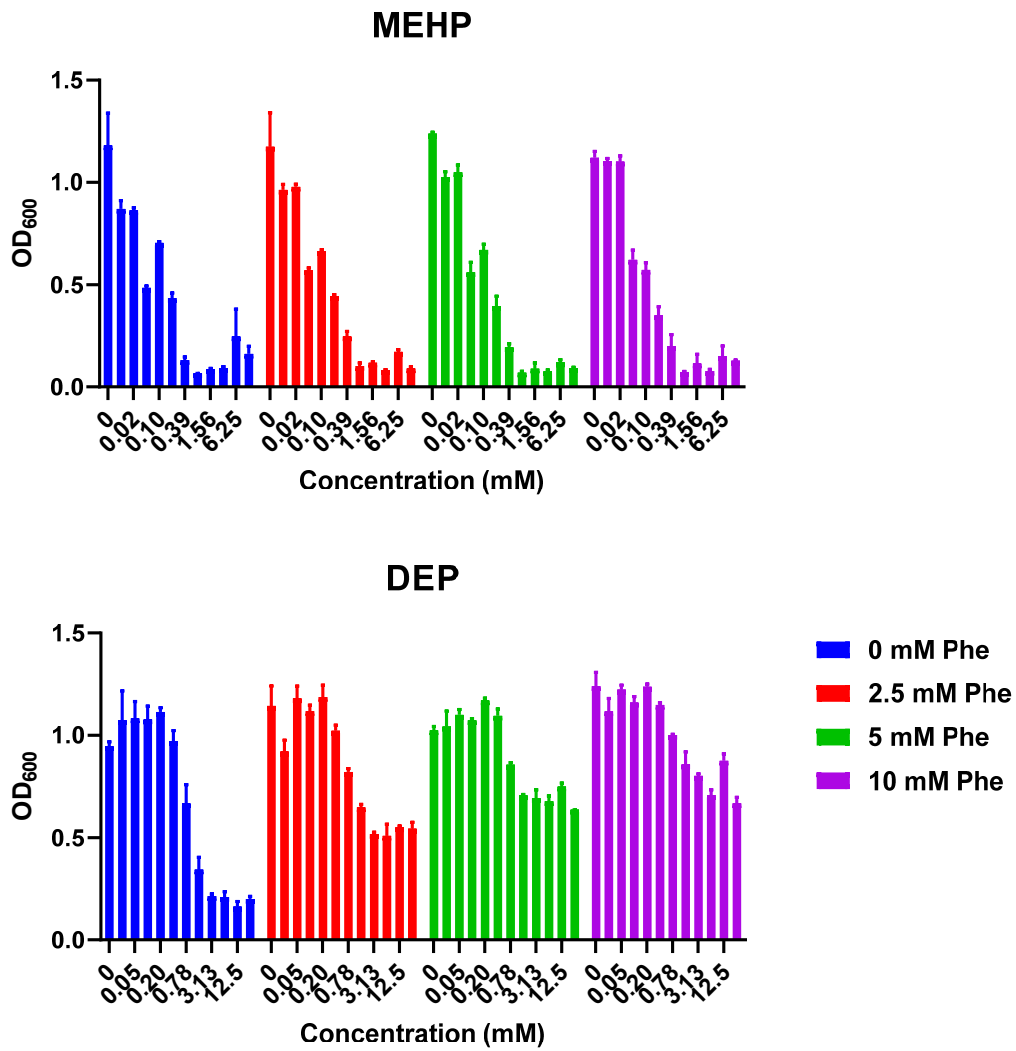

**Figure S3**

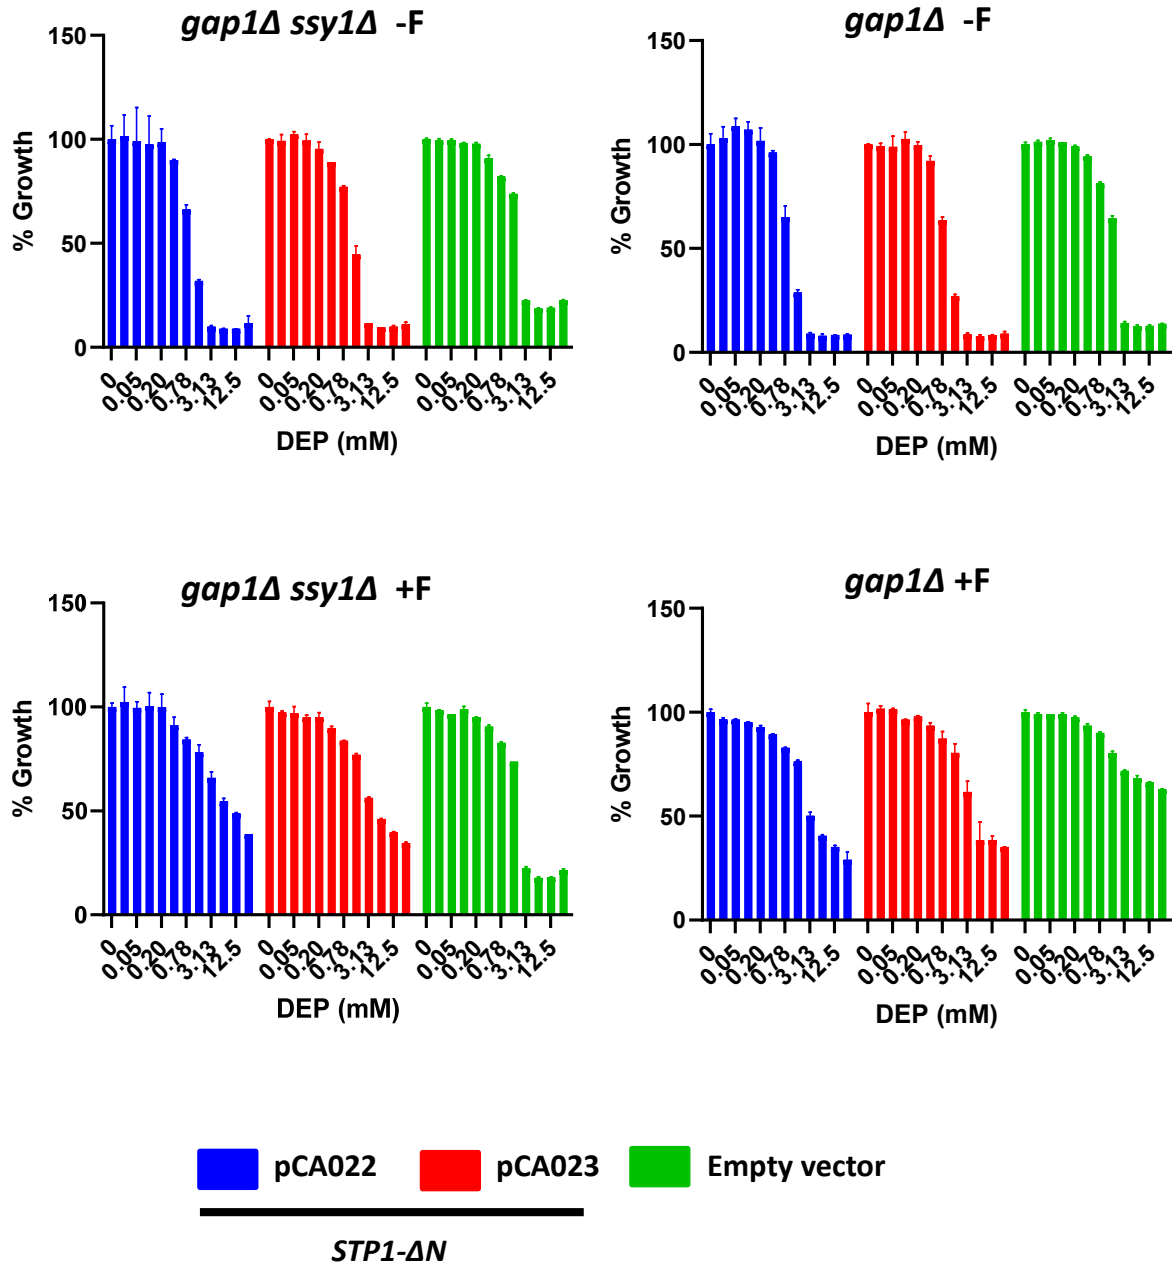

**Figure S4**

**A**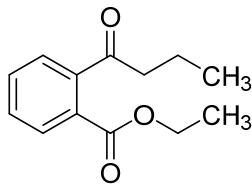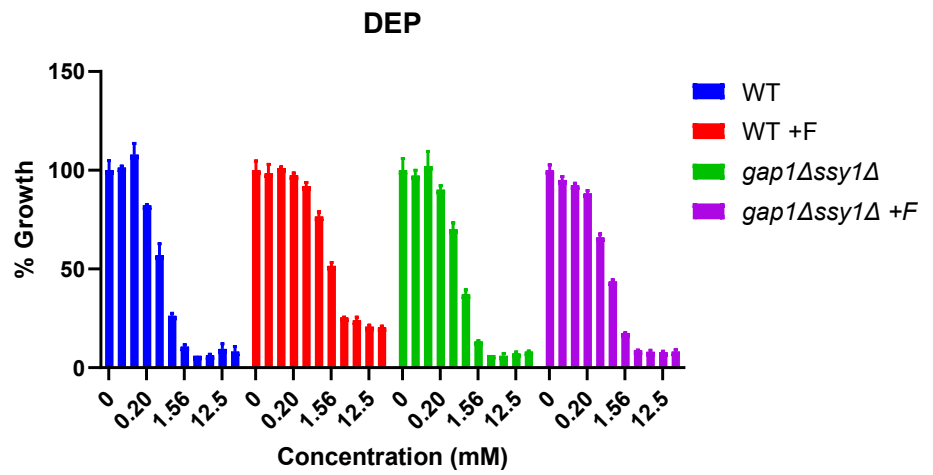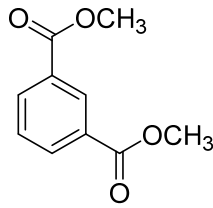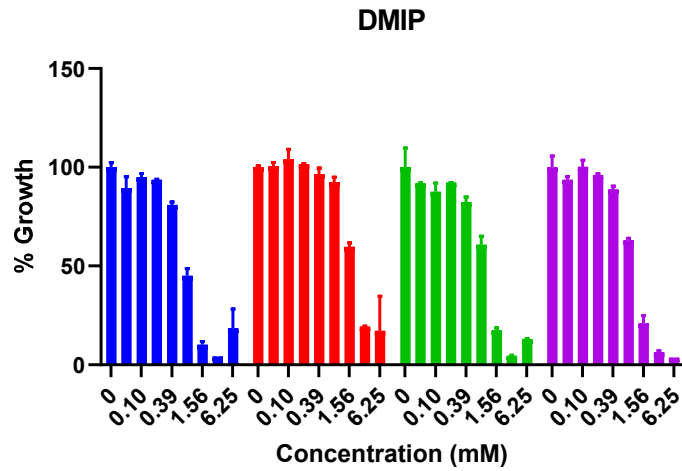**B**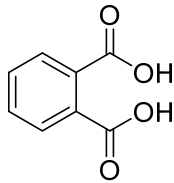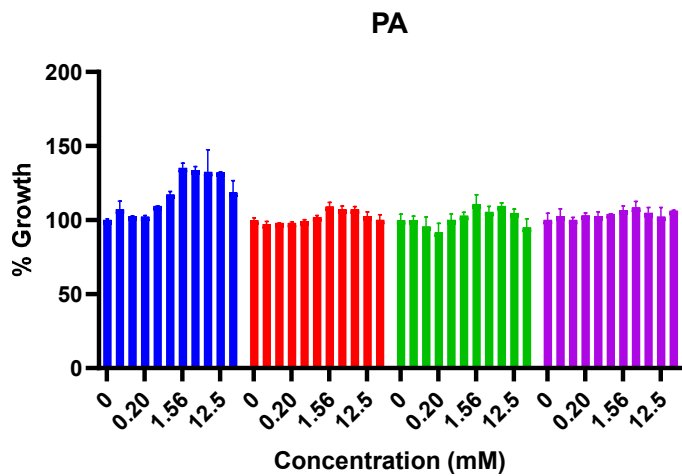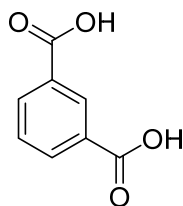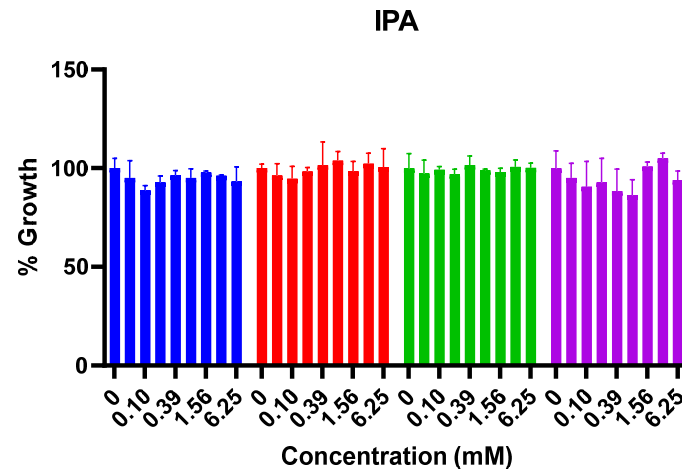**Figure S5**

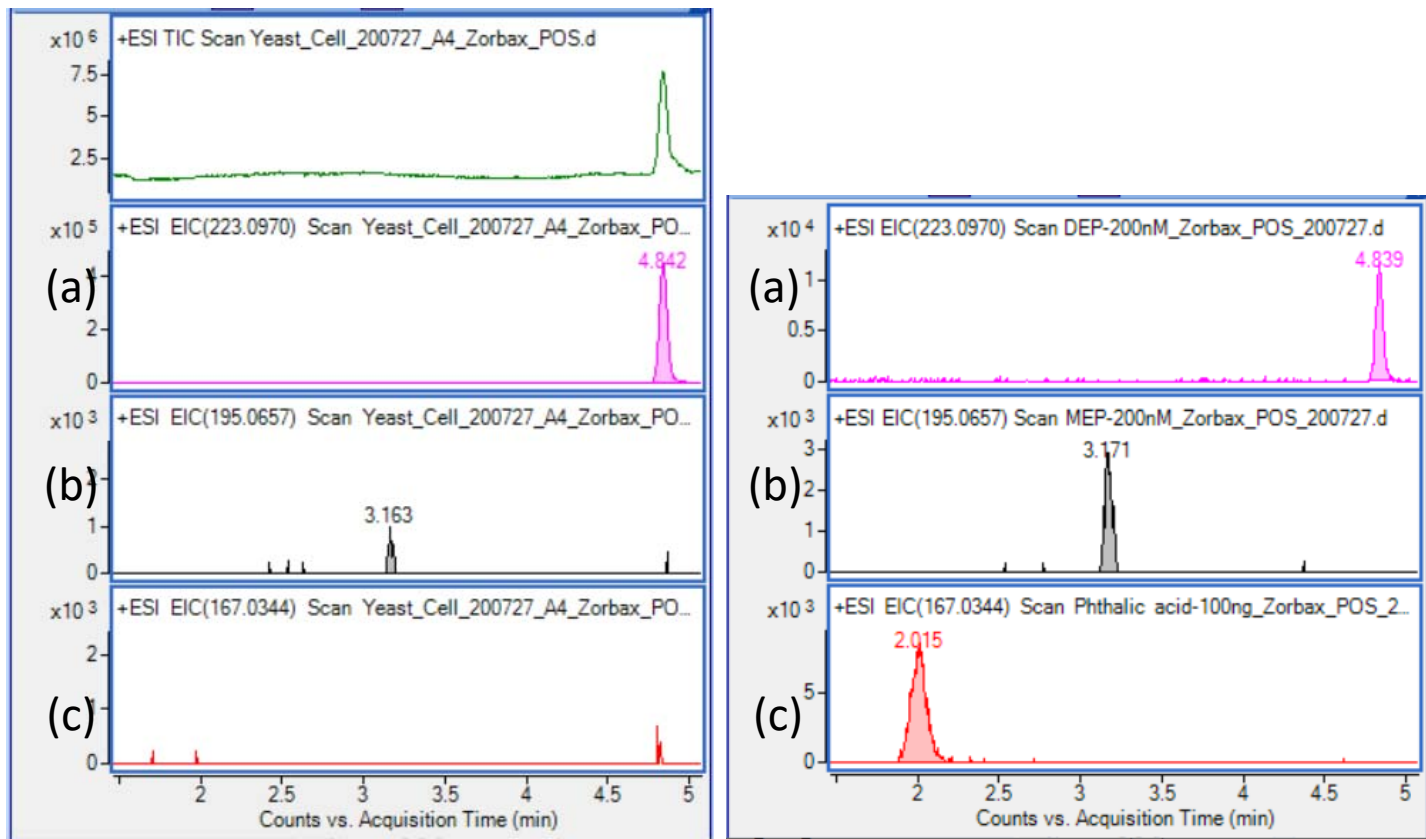

Figure S6

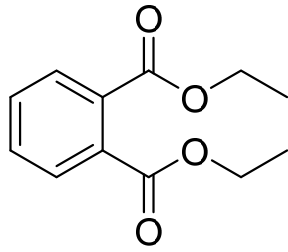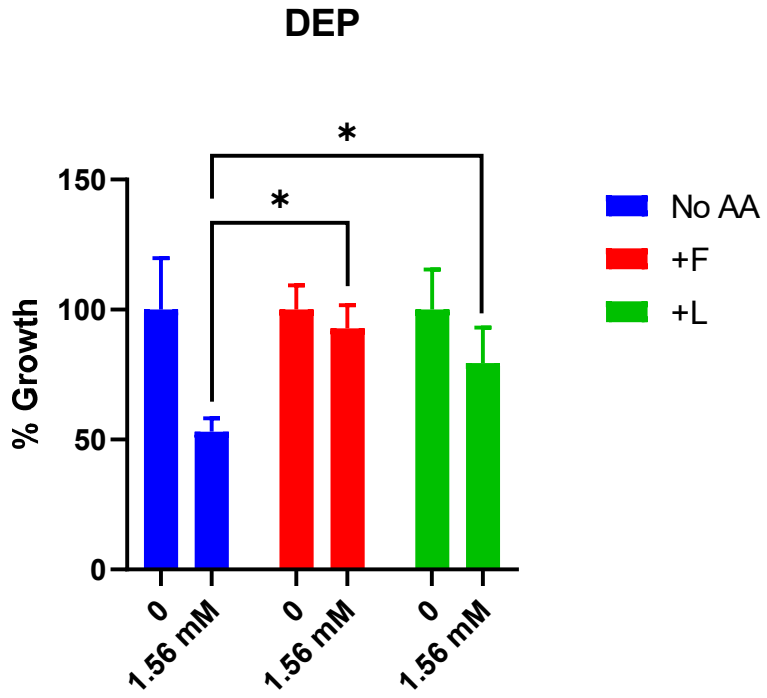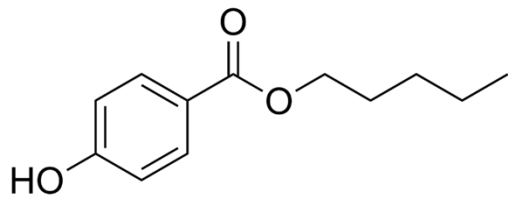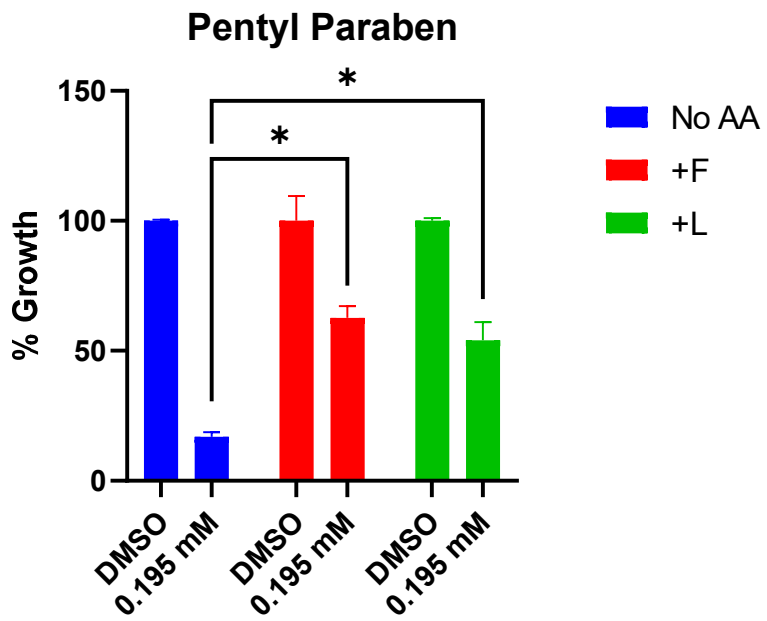

**Figure S7**

## Aromatic

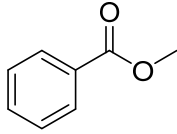

Methyl benzoate

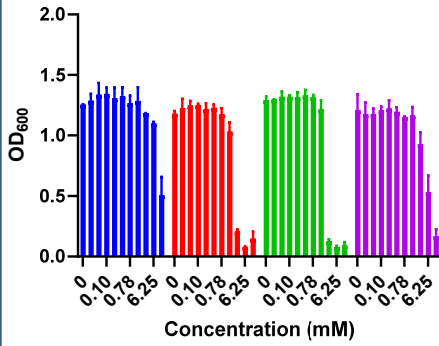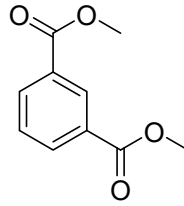

DMIP

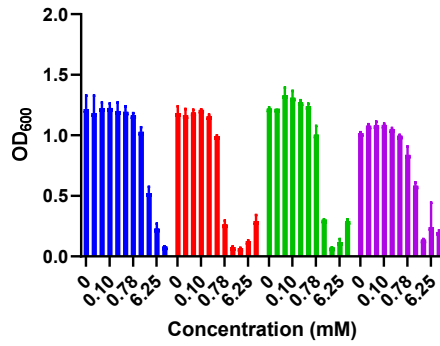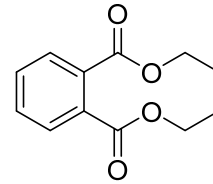

DEP

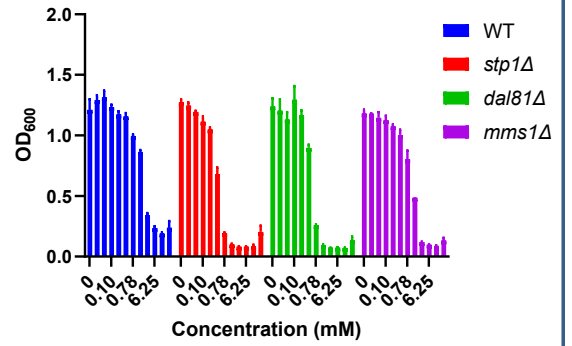

## Aliphatic

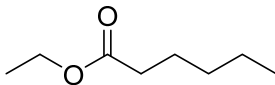

Ethyl hexanoate

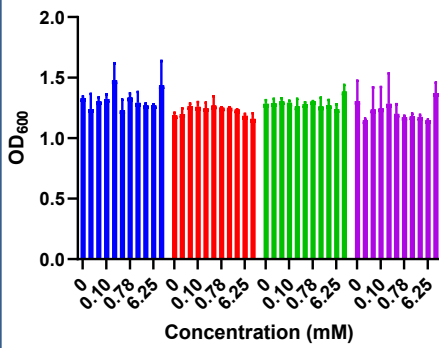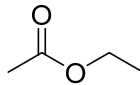

Ethyl acetate

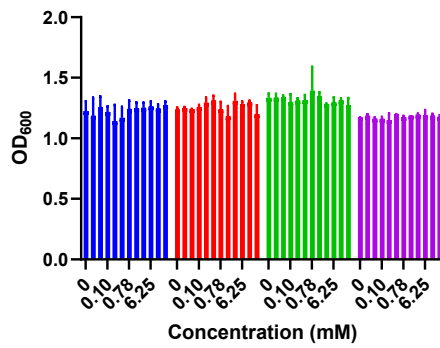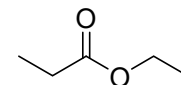

Ethyl propionate

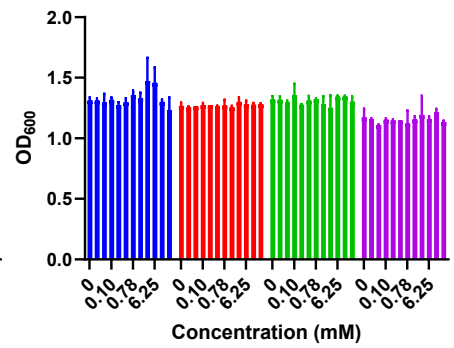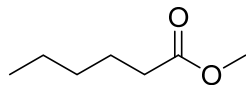

Methyl hexanoate

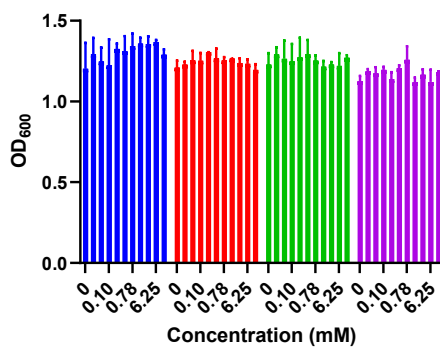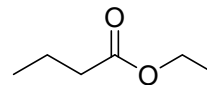

Ethyl butyrate

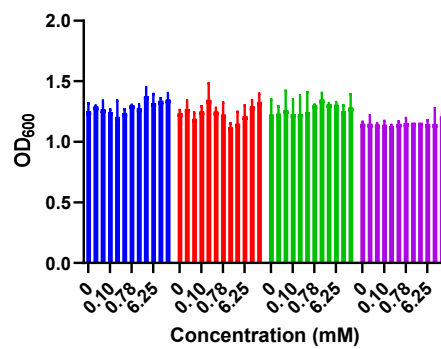

Figure S8

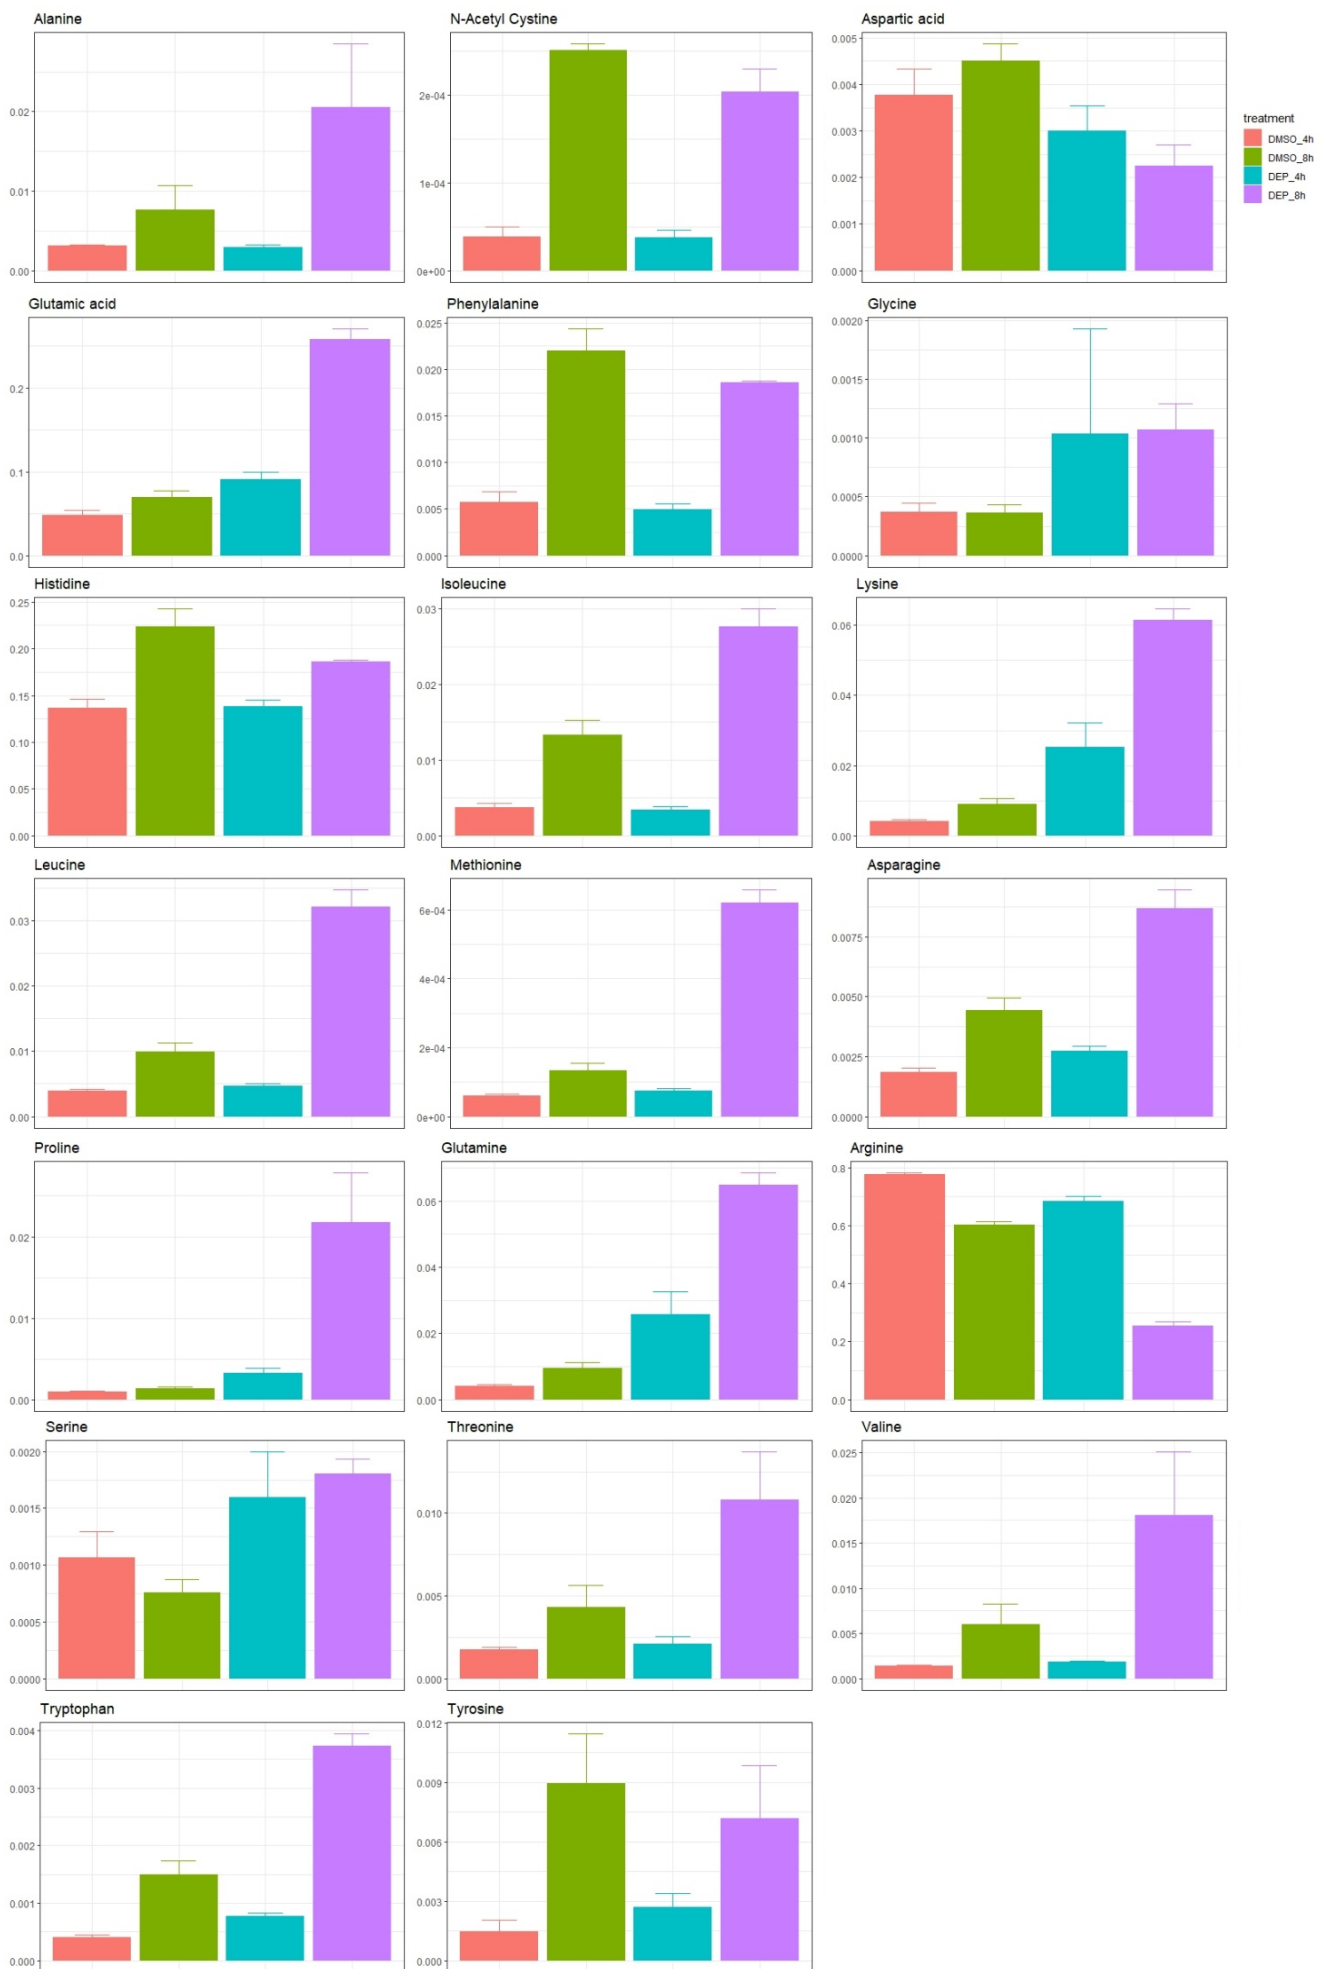

Figure S9

**A****Poor Nitrogen Medium + DEP**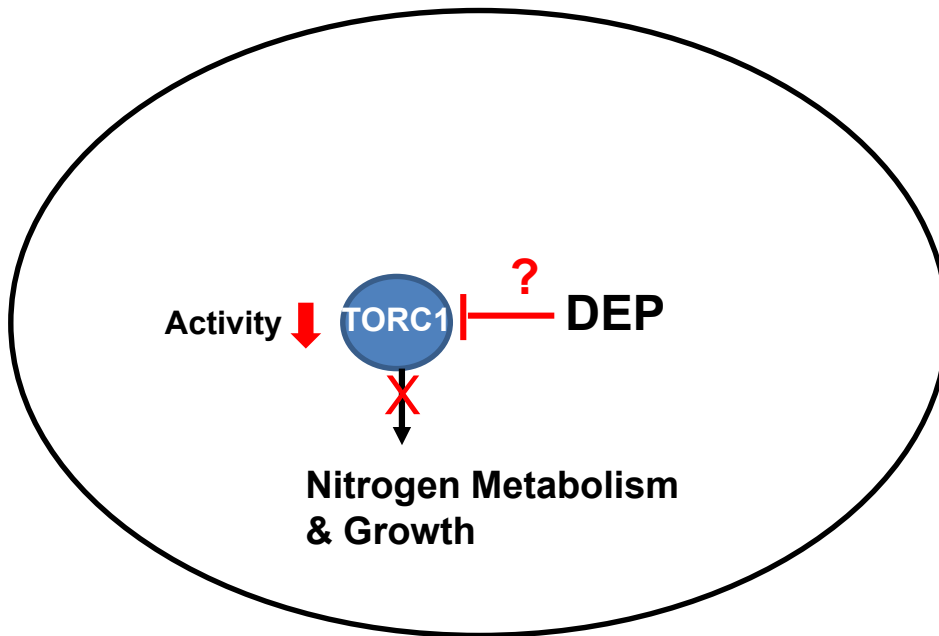**B Poor Nitrogen Medium + DEP + Amino acids (AA)**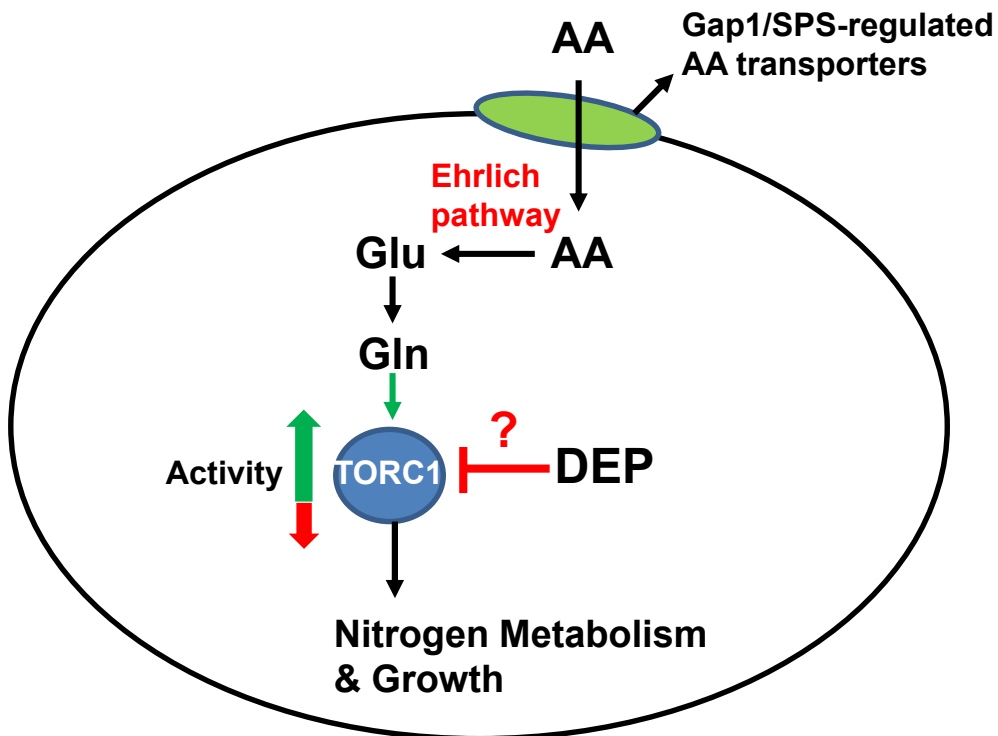**Figure S10**
